# Supplementary material for: Restauración de la predela del retablo de San Martín de Tours
Source: Oxford University Press journal article supplement (doi:10.1242/dev.066522), 1997-01-01
Supplement: dev066522tables1.pdf [file dev066522tables1.pdf]

**Table S1. Phenotypes observed following MO-mediated loss of *grhl2b***

| [MO:grhl2b]<br>delivered (mM) | MHB folding defect | MHB folding defect + MHB<br>apoptosis | No phenotype    | MHB markers<br>absent/reduced (ISH) | MHB markers present<br>(ISH) |
|-------------------------------|--------------------|---------------------------------------|-----------------|-------------------------------------|------------------------------|
| 333                           | 17/629 (2.7%)      | 439/629 (69.8%)                       | 163/629 (25.6%) | –                                   | –                            |
| 250                           | 24/121 (19.8%)     | 67/121 (55.4%)                        | 30/121 (24.8%)  | 56/79 (70.1%)                       | 23/79 (29.9%)                |
| 200                           | 83/305 (27.2%)     | 110/305 (36.1%)                       | 112/305 (36.7%) | –                                   | –                            |
| 167                           | 8/39 (20.5%)       | 14/39 (35.9%)                         | 17/39 (43.6%)   | –                                   | –                            |
| 100                           | 10/131 (7.6%)      | 4/131 (3.1%)                          | 117/131 (89.3%) | –                                   | –                            |
