# Supplementary material for: Restauración de la predela del retablo de San Martín de Tours
Source: Oxford University Press journal article supplement (doi:10.1242/dev.066522), 1997-01-01
Supplement: dev066522tables2.pdf [file dev066522tables2.pdf]

Table S2. MHB marker loss following MO-mediated loss of *grhl2b* in wild-type and *p53*<sup>-/-</sup> fish

|                                             | <i>eng2a</i>  |               |               | <i>wnt1</i>                    |               |              |
|---------------------------------------------|---------------|---------------|---------------|--------------------------------|---------------|--------------|
|                                             | Wild type     | Reduced       | Absent        | Wild type                      | Reduced       | Absent       |
| MO:grhl2b (wild-type fish)                  | 8/24 (33.3%)  | 8/24 (33.3%)  | 8/24 (33.3%)  | 5/23 (21.7%)                   | 11/23 (47.8%) | 7/23 (30.4%) |
| MO:grhl2b ( <i>p53</i> <sup>-/-</sup> fish) | 6/12 (50%)    | 4/12 (33.3%)  | 2/12 (16.7%)  | 0/7 (0%)                       | 3/7 (42.9%)   | 4/7 (57.1%)  |
|                                             | <i>pax2a</i>  |               |               | <i>her5</i>                    |               |              |
|                                             | Wild-type     | Reduced       | Absent        | Wild-type                      | Reduced       | Absent       |
| MO:grhl2b (wild-type fish)                  | 7/14 (50%)    | 2/14 (14.3%)  | 4/14 (22.2%)  | 8/18 (44.4%)                   | 7/18 (38.9%)  | 3/18 (16.7%) |
| MO:grhl2b ( <i>p53</i> <sup>-/-</sup> fish) | 11/18 (61.1%) | 4/18 (22.2%)  | 3/18 (16.7%)  | 4/8 (50%)                      | 0/8 (0%)      | 4/8 (50%)    |
|                                             | Total         |               |               |                                |               |              |
|                                             | Normal        | Reduced       | Absent        |                                |               |              |
| MO:grhl2b (wild-type fish)                  | 28/79 (35.4%) | 28/79 (35.4%) | 23/79 (29.1%) | P-value ( $\chi^2$ test)=0.219 |               |              |
| MO:grhl2b ( <i>p53</i> <sup>-/-</sup> fish) | 21/45 (46.7%) | 11/45 (24.4%) | 13/45 (28.9%) |                                |               |              |
